# Supplementary material
Source: PubMed Central journal article supplement (PMC2924160)

# Asymmetric Suzuki Cross-Couplings of Activated Secondary Alkyl Electrophiles: Arylations of $\alpha$ -Chloroamides

Pamela M. Lundin and Gregory C. Fu\*

Department of Chemistry, Massachusetts Institute of Technology, Cambridge, Massachusetts 02139

## Supporting Information

### Table of Contents

|                                                                         |      |
|-------------------------------------------------------------------------|------|
| I. General Information                                                  | S-1  |
| II. Preparation of $\alpha$ -Chloroamides                               | S-1  |
| III. Preparation of Aryl-(9-BBN) Reagents                               | S-6  |
| IV. Asymmetric Suzuki Arylations of $\alpha$ -Chloroamides              | S-7  |
| V. Functionalization Reactions and Assignment of Absolute Configuration | S-14 |
| VI. $^1\text{H}$ NMR Spectra                                            | S-17 |

### I. General Information

The following reagents were purchased and used without purification:  $\text{NiBr}_2 \cdot \text{diglyme}$  (Strem), (-)-(S,S)-**1**, (+)-(R,R)-**1** (Acros),  $\text{KO}t\text{-Bu}$  (Alfa), *i*-BuOH (Aldrich), toluene (Aldrich; anhydrous), and *B*-methoxy-(9-BBN) (Aldrich; 1.0 M solution in hexanes). Indoline (Alfa) was distilled prior to use.

All reactions were carried out in oven-dried glassware under an atmosphere of argon or nitrogen.

HPLC analyses were carried out on an Agilent 1100 series system with Daicel Chiralpak® columns.

### II. Preparation of $\alpha$ -Chloroamides

The procedures and yields have not been optimized.

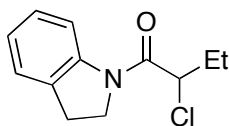

**2-Chloro-1-(indolin-1-yl)butan-1-one.** 2-Chlorobutyric acid (2.06 mL, 20.0 mmol) and anhydrous  $\text{CH}_2\text{Cl}_2$  (45 mL) were added to an oven-dried flask under argon. This solution was cooled to 0 °C, and then oxalyl chloride (2.5 mL, 30 mmol, 1.5 equiv) and dimethylformamide

(0.15 mL, 1.9 mmol, 0.097 equiv) were added. The reaction mixture was stirred at 0 °C for 1.5 h, and then it was transferred via cannula to an oven-dried flask that contained a solution of indoline (3.4 mL, 30 mmol, 1.5 equiv) and triethylamine (4.18 mL, 30 mmol, 1.5 equiv) in anhydrous CH<sub>2</sub>Cl<sub>2</sub> (30 mL) at 0 °C. The reaction mixture was stirred for 1.5 h as it was allowed to warm to room temperature. The reaction was then quenched by the addition of aqueous HCl (1 M; 45 mL), and the resulting mixture was extracted with CH<sub>2</sub>Cl<sub>2</sub> (50 mL × 2). The combined organic layers were washed with brine (30 mL), dried over Na<sub>2</sub>SO<sub>4</sub>, and concentrated. The residue was purified by flash chromatography (5%→10% EtOAc in pentane), which furnished the product as a white crystalline solid (1.5 g, 34%).

<sup>1</sup>H NMR (400 MHz, CDCl<sub>3</sub>): δ 8.26 (d, 1H, *J* = 8.0 Hz), 7.25-7.19 (m, 2H), 7.09-7.04 (m, 1H), 4.41-4.30 (m, 2H), 4.11 (dt, 1H, *J* = 7.1, 9.9 Hz), 3.32-3.17 (m, 2H), 2.27-2.16 (m, 1H), 2.10-1.99 (m, 1H), 1.08 (t, 3H, *J* = 7.3 Hz);

<sup>13</sup>C NMR (100 MHz, CDCl<sub>3</sub>): δ 166.5, 142.8, 131.6, 127.9, 124.8, 124.6, 117.8, 58.4, 48.0, 28.3, 27.7, 11.3;

IR (film): 1655, 1598, 1484, 1423, 1342, 1310, 761 cm<sup>-1</sup>;

LRMS (EI) for C<sub>12</sub>H<sub>15</sub>ClNO (M+H): calcd 224, found 224.

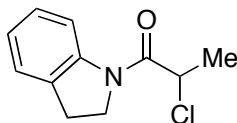

**2-Chloro-1-(indolin-1-yl)propan-1-one [107236-27-1].** 2-Chloropropionyl chloride (3.17 g, 25.0 mmol) was added to a flask that contained indoline (3.08 mL, 27.5 mmol, 1.1 equiv), triethylamine (3.83 mL, 27.5 mmol, 1.1 equiv), and THF (30 mL). The solution immediately turned into a thick slurry, which was stirred for 45 min before the reaction was quenched by the addition of HCl (1 M; 30 mL). EtOAc (30 mL) was added, and the phases were separated. The aqueous layer was extracted EtOAc (30 mL × 2), and the combined organic layers, washed with brine (30 mL), dried over Na<sub>2</sub>SO<sub>4</sub>, and concentrated. The residue was purified by flash chromatography (10% EtOAc in pentane), which furnished the product as a white crystalline solid (2.32 g, 44%).

<sup>1</sup>H NMR (400 MHz, CDCl<sub>3</sub>): δ 8.24 (d, 1H, *J* = 8.0 Hz), 7.25-7.18 (m, 2H), 7.07 (t, 1H, *J* = 7.4 Hz), 4.59 (q, 1H, *J* = 6.5 Hz), 4.48-4.36 (m, 1H), 4.14-4.05 (m, 1H), 3.32-3.16 (m, 2H), 1.75 (d, 3H, *J* = 6.6 Hz);

<sup>13</sup>C NMR (100 MHz, CDCl<sub>3</sub>): δ 166.8, 142.8, 131.6, 127.9, 124.8, 124.6, 117.7, 52.2, 47.9, 28.3, 20.7;

IR (film): 1652, 1595, 1482, 1417, 1060, 1004, 755 cm<sup>-1</sup>;

LRMS (EI) for C<sub>11</sub>H<sub>13</sub>ClNO (M+H): calcd 210, found 210.

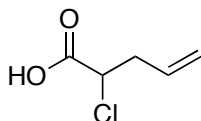

**2-Chloropent-4-enoic acid [909778-25-2].** A solution of sodium nitrite (1.30 g, 18.9 mmol, 1.6 equiv) in water (3.5 mL) was added to a solution of D,L-allylglycine (1.36 g, 11.8 mmol, 1.0 equiv) in HCl (5 N; 20 mL) at 0 °C under argon. The reaction mixture was stirred at 0 °C for 5 h, and then it was allowed to warm to room temperature overnight. Sodium carbonate (800 mg) was added, and then the reaction mixture was extracted with Et<sub>2</sub>O (10 mL × 4). The organic layers were combined and washed with brine (10 mL). The brine was extracted with Et<sub>2</sub>O (10 mL × 3). The organic layers were combined, dried over Na<sub>2</sub>SO<sub>4</sub>, and concentrated to give a yellow oil (683 mg, 62%), which was used in the next step without further purification.

<sup>1</sup>H NMR (400 MHz, CDCl<sub>3</sub>): δ 7.31 (br s, 1H), 5.81 (tdd, 1H, *J* = 6.9, 10.2, 17.1 Hz), 5.25-5.18 (m, 2H), 4.39-4.34 (m, 1H), 2.86-2.77 (m, 1H), 2.75-2.66 (m, 1H);

<sup>13</sup>C NMR (100 MHz, CDCl<sub>3</sub>): δ 174.6, 131.6, 119.8, 56.0, 38.9;

IR (film): 1734, 1653, 1559, 1507, 1436, 1279, 668 cm<sup>-1</sup>.

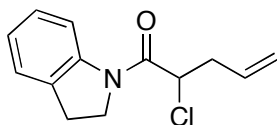

**2-Chloro-1-(indolin-1-yl)pent-4-en-1-one.** Oxalyl chloride (0.46 mL, 5.42 mmol, 1.1 equiv) and DMF (0.1 mL) were added to a solution of 2-chloropent-4-enoic acid (663 mg, 4.93 mmol) in CH<sub>2</sub>Cl<sub>2</sub> (10 mL) at 0 °C. The solution was stirred for 2 h as it warmed to room temperature. Then, it was added via cannula to a solution of indoline (0.61 mL, 5.42 mmol, 1.1 equiv) and triethylamine (0.71 mL, 5.42 mmol, 1.1 equiv) in CH<sub>2</sub>Cl<sub>2</sub> (10 mL) at 0 °C. The reaction mixture was stirred for 15 min, and then the reaction was quenched with HCl (1 M; 20 mL) and the phases were separated. The aqueous layer was extracted with CH<sub>2</sub>Cl<sub>2</sub> (20 mL × 2). The organic layers were combined, washed with brine (10 mL), dried over Na<sub>2</sub>SO<sub>4</sub>, and concentrated. The residue was purified by flash chromatography (5% EtOAc in pentane), which furnished 2-chloro-1-(indolin-1-yl)pent-4-en-1-one (360 mg, 31%) as a white solid.

<sup>1</sup>H NMR (400 MHz, CDCl<sub>3</sub>): δ 8.25 (d, 1H, *J* = 8.0 Hz), 7.25-7.19 (m, 2H), 7.10-7.04 (m, 1H), 5.86 (tdd, 1H, *J* = 6.9, 10.2, 17.1 Hz), 5.25 (dd, 1H, *J* = 1.4, 17.1 Hz), 5.17 (d, 1H, *J* = 10.1 Hz), 4.38-4.31 (m, 2H), 4.15-4.06 (m, 1H), 3.31-3.16 (m, 2H), 2.96 (td, 1H, *J* = 6.8, 13.7 Hz), 2.75 (td, 1H, *J* = 7.3, 14.5 Hz);

<sup>13</sup>C NMR (100 MHz, CDCl<sub>3</sub>): δ 166.0, 142.7, 133.3, 131.7, 127.9, 124.8, 124.7, 119.3, 117.8, 55.7, 48.0, 38.5, 28.3;

IR (film): 1664, 1600, 1483, 1418, 1341, 1318, 924, 756 cm<sup>-1</sup>;

LRMS (EI) for C<sub>13</sub>H<sub>15</sub>ClNO (M+H): calcd 236, found 236.

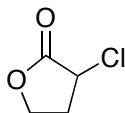

**$\alpha$ -Chloro- $\gamma$ -butyrolactone [31167-90-5].** A cold solution of  $\text{NaNO}_2$  (3.45 g, 50 mmol, 1.63 equiv) was added by pipette over 5 min to a solution of D,L-homoserine (3.64 g, 30.6 mmol) in HCl (5 N; 50 mL) at 0 °C. The reaction mixture was allowed to warm to room temperature overnight. Next,  $\text{Na}_2\text{CO}_3$  (1.33 g) was added, and the reaction mixture was extracted with  $\text{Et}_2\text{O}$  (75 mL  $\times$  3). The combined organic layers were washed with brine (50 mL), which was then extracted with  $\text{Et}_2\text{O}$  (75 mL  $\times$  4). The organic layers were combined, dried over  $\text{Na}_2\text{SO}_4$ , and concentrated. The residue was purified by flash chromatography (30% EtOAc in pentane), which furnished the product (1.82 g, 50%) as a yellow oil.

$^1\text{H}$  NMR (400 MHz,  $\text{CDCl}_3$ ):  $\delta$  4.53 (td, 1H,  $J = 6.9, 9.1$  Hz), 4.49-4.36 (m, 2H), 2.78 (dt, 1H,  $J = 7.2, 14.3$  Hz), 2.48 (tdd, 1H,  $J = 5.1, 6.9$  Hz, 13.9 Hz);

$^{13}\text{C}$  NMR (100 MHz,  $\text{CDCl}_3$ ):  $\delta$  66.6, 50.4, 33.4;

IR (film): 1785, 1376, 1213, 1168, 1020, 896  $\text{cm}^{-1}$ .

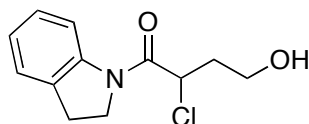

**2-Chloro-4-hydroxy-1-(indolin-1-yl)butan-1-one.** Indoline (4.1 mL, 36.4 mmol, 2.6 equiv) was added to an oven-dried flask containing  $\text{AlCl}_3$  (2.43 g, 18.2 mmol, 1.3 equiv) in anhydrous  $\text{CH}_2\text{Cl}_2$  (15 mL) at 0 °C. The solution was stirred for 5 min at 0 °C, and then  $\alpha$ -chloro- $\gamma$ -butyrolactone (1.68 g, 13.9 mmol, 1.0 equiv) was added. The solution was stirred for 2 h at room temperature, and then the reaction was quenched with water and stirred overnight. The reaction mixture was filtered through celite and concentrated.  $\text{CH}_2\text{Cl}_2$  and water were added to the residue, and the organic layer was separated and concentrated. The residue was purified by flash chromatography (2:3  $\rightarrow$  2:1 EtOAc:pentane, followed by 1:3  $\rightarrow$  1:1 EtOAc:pentane), which provided the product (750 mg, 20%) as a yellow oil.

$^1\text{H}$  NMR (400 MHz,  $\text{CDCl}_3$ ):  $\delta$  8.22 (d, 1H,  $J = 7.9$  Hz), 7.25-7.20 (m, 2H), 7.10-7.05 (m, 1H), 4.80-4.74 (m, 1H), 4.39 (dt, 1H,  $J = 7.3, 9.8$  Hz), 4.17 (dt, 1H,  $J = 7.2, 10.0$  Hz), 3.88 (dd, 2H,  $J = 4.9, 11.0$  Hz), 3.32-3.17 (m, 2H), 2.47-2.38 (m, 1H), 2.31-2.22 (m, 1H), 1.80 (t, 1H,  $J = 4.9$  Hz);

$^{13}\text{C}$  NMR (100 MHz,  $\text{CDCl}_3$ ):  $\delta$  166.7, 142.5, 131.7, 127.6, 124.73, 124.66, 117.6, 58.7, 53.8, 47.9, 36.7, 28.0;

IR (film): 1660, 1598, 1483, 1418, 1263, 1054, 756  $\text{cm}^{-1}$ ;

LRMS (EI) for  $\text{C}_{12}\text{H}_{15}\text{ClNO}_2$  (M+H): calcd 240, found 240.

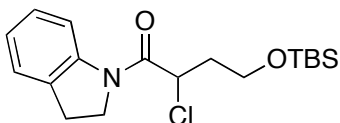

**4-(*tert*-Butyldimethylsilyloxy)-2-chloro-1-(indolin-1-yl)butan-1-one.** TBSCl (0.82 g, 5.33 mmol, 1.25 equiv), imidazole (732 mg, 10.7 mmol, 2.5 equiv), and DMAP (60 mg) were added in turn to a solution of 2-chloro-4-hydroxy-1-(indolin-1-yl)butan-1-one (1.02 g, 4.26 mmol) in DMF (5 mL) at 0 °C. The resulting solution was allowed to warm to room temperature with stirring overnight. Next, the reaction mixture was diluted with EtOAc (15 mL) and poured into saturated NaHCO<sub>3</sub> (20 mL). The phases were separated, and the aqueous layer was extracted with EtOAc (15 mL × 2). The organic layers were combined and washed with brine (20 mL), dried over Na<sub>2</sub>SO<sub>4</sub>, and concentrated. The residue was purified by flash chromatography (7% EtOAc in pentane), followed by recrystallization from EtOAc, which furnished the product as a white solid (720 mg, 43%).

<sup>1</sup>H NMR (400 MHz, CDCl<sub>3</sub>): δ 8.26 (d, 1H, *J* = 8.0 Hz), 7.25-7.19 (m, 2H), 7.09-7.04 (m, 1H), 4.77 (dd, 1H, *J* = 5.6, 8.2 Hz), 4.36 (dt, 1H, *J* = 7.2, 9.9 Hz), 4.12 (dt, 1H, *J* = 7.0, 10.0 Hz), 3.84 (ddd, 1H, *J* = 3.8, 8.0, 11.7 Hz), 3.76 (ddd, 1H, *J* = 4.6, 5.3, 10.3 Hz), 3.32-3.17 (m, 2H), 2.34 (dddd, 1H, *J* = 4.5, 5.5, 8.0, 12.5 Hz), 2.19 (dddd, 1H, *J* = 3.8, 5.6, 9.3, 11.0 Hz), 0.89 (s, 9H), 0.06 (d, 6H, *J* = 11.6 Hz);

<sup>13</sup>C NMR (100 MHz, CDCl<sub>3</sub>): δ 166.7, 142.8, 131.7, 127.8, 124.8, 124.6, 117.8, 59.2, 53.6, 47.9, 37.3, 28.2, 26.1, 18.4 –5.2 –5.3;

IR (film): 1668, 1600, 1483, 1413, 1257, 1103, 937, 834, 778, 755 cm<sup>-1</sup>;

LRMS (EI) for C<sub>18</sub>H<sub>28</sub>ClNO<sub>2</sub>Si: calcd 353, found 353.

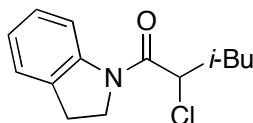

**2-Chloro-1-(indolin-1-yl)-4-methylpentan-1-one.** Oxalyl chloride (1.18 mL, 13.4 mmol, 1.1 equiv) and DMF (0.1 mL, 1.3 mmol, 0.11 equiv) were added to a 0 °C solution of α-chloroisocaproic acid<sup>1</sup> (1.84 g, 12.2 mmol) in anhydrous CH<sub>2</sub>Cl<sub>2</sub> (36 mL) in an oven-dried flask under argon. The reaction mixture was allowed to warm to room temperature with stirring overnight. The solution was then transferred by cannula to a solution of indoline (1.50 mL, 13.4 mmol, 1.1 equiv) and triethylamine (1.87 mL, 13.4 mmol, 1.1 equiv) in anhydrous CH<sub>2</sub>Cl<sub>2</sub> (30 mL) at 0 °C under argon. The suspension was stirred for 4 h, and then the reaction was quenched by the addition of HCl (1 M; 20 mL). The reaction mixture was extracted with CH<sub>2</sub>Cl<sub>2</sub> (20 mL × 2), and the combined organic layers were washed with brine (20 mL), dried over Na<sub>2</sub>SO<sub>4</sub>, and concentrated. The residue was purified by flash chromatography (5% EtOAc in hexanes), which furnished the product (2.20 g, 72%) as a white solid.

(1) Koppenhoefer, B.; Schurig, V. *Org. Syntheses* **1988**, *66*, 151–155.

$^1\text{H}$  NMR (400 MHz,  $\text{CDCl}_3$ ):  $\delta$  8.25 (d, 1H,  $J = 8.0$  Hz), 7.27-7.19 (m, 2H), 7.06 (t, 1H,  $J = 7.4$  Hz), 4.49 (t, 1H,  $J = 7.2$  Hz), 4.42-4.34 (m, 1H), 4.16-4.07 (m, 1H), 3.32-3.17 (m, 2H), 2.01-1.95 (m, 2H), 1.91-1.80 (m, 1H), 1.00-0.94 (m, 6H);

$^{13}\text{C}$  NMR (100 MHz,  $\text{CDCl}_3$ ):  $\delta$  166.7, 142.9, 131.6, 127.9, 124.8, 124.6, 117.8, 55.2, 48.0, 42.8, 28.3, 25.3, 22.9, 22.1;

IR (film): 1668, 1600, 1482, 1413, 1262, 1107, 755  $\text{cm}^{-1}$ ;

LRMS (EI) for  $\text{C}_{14}\text{H}_{19}\text{ClNO}$  (M+H): calcd 252, found 252.

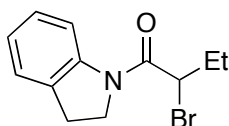

**2-Bromo-1-(indolin-1-yl)butan-1-one.** Triethylamine (2.77 g, 27.5 mmol, 1.1 equiv) and then 2-bromo-*n*-butyryl bromide were added to an oven-dried flask under argon that contained a solution of indoline (3.28 g, 27.5 mmol, 1.1 equiv) in THF (50 mL) at 0 °C. The reaction mixture was stirred at 0 °C for 1 h, and then the reaction was quenched by the addition of HCl (1 M; 30 mL) and EtOAc (30 mL). The phases were separated, and the aqueous layer was extracted EtOAc (2  $\times$  30 mL). The organic layers were combined, washed with brine (30 mL), and dried over  $\text{Na}_2\text{SO}_4$ . The residue was purified by flash chromatography (10% EtOAc in pentane), which furnished the product (4.22 g, 63%) as a white crystalline solid.

$^1\text{H}$  NMR (400 MHz,  $\text{CDCl}_3$ ):  $\delta$  8.27 (d, 1H,  $J = 8.0$  Hz), 7.24-7.17 (m, 2H), 7.09-7.03 (m, 1H), 4.37-4.29 (m, 2H), 4.07 (dt, 1H,  $J = 7.1, 10.0$  Hz), 3.30-3.15 (m, 2H), 2.27 (pentet d, 1H,  $J = 7.2, 14.3$  Hz), 2.12 (pentet d, 1H,  $J = 7.4, 14.7$  Hz), 1.06 (t, 3H,  $J = 7.3$  Hz);

$^{13}\text{C}$  NMR (400 MHz,  $\text{CDCl}_3$ ):  $\delta$  166.6, 142.7, 131.5, 127.7, 124.7, 124.4, 117.6, 48.3, 47.9, 28.1, 27.9, 12.3;

IR (film): 1653, 1576, 1457, 1419, 1161, 755, 668  $\text{cm}^{-1}$ ;

LRMS (EI) for  $\text{C}_{12}\text{H}_{14}\text{BrNO}$ : calcd 267, found 267.

### III. Preparation of Aryl-(9-BBN) Reagents

**General Procedure.** All aryl-(9-BBN) reagents were prepared by following a literature procedure for the synthesis of Ph-(9-BBN) via the reaction of phenylmagnesium chloride with *B*-methoxy-(9-BBN).<sup>2</sup> Although we routinely purified the aryl-(9-BBN) reagents by distillation, we have obtained comparable results when the aryl-(9-BBN) reagent (1.8 equiv) was not distilled prior to use in the asymmetric Suzuki reaction.

**9-Phenyl-9-borabicyclo[3.3.1]nonane [23418-91-9].** Prepared from *B*-methoxy-(9-BBN) and phenylmagnesium bromide. Distilled at 95 °C at 240 mTorr.

---

(2) Fang, G. Y.; Wallner, O. A.; Di Blasio, N.; Ginesta, X.; Harvey, J. N.; Aggarwal, V. K. *J. Am. Chem. Soc.* **2007**, *129*, 14632–14639.

<sup>1</sup>H NMR (400 MHz, CDCl<sub>3</sub>): δ 7.98 (d, 2H, *J* = 7.0 Hz), 7.58-7.53 (m, 1H), 7.50-7.45 (m, 2H), 2.29-2.24 (m, 2H), 2.06-1.96 (m, 6H), 1.87-1.76 (m, 4H), 1.31 (ddd, 2H);

**9-(3-Chlorophenyl)-9-borabicyclo[3.3.1]nonane.** Prepared from *B*-methoxy-(9-BBN) and 3-chlorophenylmagnesium bromide. Distilled at 150 °C at 400 mTorr.

<sup>1</sup>H NMR (400 MHz, CDCl<sub>3</sub>): δ 7.91-7.89 (m, 1H), 7.84-7.80 (m, 1H), 7.52 (ddd, 1H, *J* = 1.2, 2.3, 8.0 Hz), 7.43-7.38 (m, 1H), 2.29-2.22 (m, 2H), 2.06-1.96 (m, 6H), 1.85-1.75 (m, 4H), 1.35-1.25 (m, 2H);

<sup>13</sup>C NMR (100 MHz, CDCl<sub>3</sub>): δ 134.7, 134.5, 132.72, 132.67, 129.7, 34.3, 29.8, 23.6;

<sup>11</sup>B NMR (128 MHz, CDCl<sub>3</sub>): δ 61.

**9-(3-Methylphenyl)-9-borabicyclo[3.3.1]nonane.** Prepared from *B*-methoxy-(9-BBN) and 3-methylphenylmagnesium bromide. Distilled at 110 °C at 290 mTorr.

<sup>1</sup>H NMR (400 MHz, CDCl<sub>3</sub>): δ 7.85-7.80 (m, 2H), 7.44-7.40 (m, 2H), 2.46 (s, 3H), 2.35-2.30 (m, 2H), 2.09-2.00 (m, 6H), 1.92-1.81 (m, 4H), 1.40-1.29 (m, 2H);

<sup>13</sup>C NMR (100 MHz, CDCl<sub>3</sub>): δ 138.7, 137.5, 135.5, 133.8, 131.9, 128.2, 34.3, 29.3, 23.7, 21.7;

<sup>11</sup>B NMR (128 MHz, CDCl<sub>3</sub>): δ 81.

**9-(4-Methoxyphenyl)-9-borabicyclo[3.3.1]nonane.** Prepared from *B*-methoxy-(9-BBN) and 4-methoxyphenylmagnesium bromide. After filtration and concentration, the aryl-(9-BBN) reagent was used without further purification.

<sup>1</sup>H NMR (400 MHz, CDCl<sub>3</sub>): δ 8.01-7.96 (m, 2H), 7.03-6.98 (m, 2H), 3.89 (s, 3H), 2.27 (br s, 2H), 2.05-1.95 (m, 6H), 1.86-1.74 (m, 4H), 1.37-1.27 (m, 2H);

<sup>13</sup>C NMR (100 MHz, CDCl<sub>3</sub>): δ 163.7, 137.0, 130.9, 113.5, 55.2, 34.1, 28.4, 23.5;

<sup>11</sup>B NMR (128 MHz, CDCl<sub>3</sub>): δ 78.

**9-(4-Fluorophenyl)-9-borabicyclo[3.3.1]nonane.** Prepared from *B*-methoxy-(9-BBN) and 4-fluorophenylmagnesium bromide. Distilled at 76 °C at 200 mTorr.

<sup>1</sup>H NMR (400 MHz, CDCl<sub>3</sub>): δ 8.01-7.95 (m, 2H), 7.17-7.10 (m, 2H), 2.29-2.22 (m, 2H), 2.05-1.91 (m, 6H), 1.85-1.74 (m, 4H), 1.35-1.25 (m, 2H);

<sup>13</sup>C NMR (100 MHz, CDCl<sub>3</sub>): δ 167.7, 165.2, 137.4, 115.3, 34.3, 29.2, 23.6;

<sup>11</sup>B NMR (128 MHz, CDCl<sub>3</sub>): δ 80.

#### IV. Asymmetric Suzuki Arylations of $\alpha$ -Chloroamides

**General Procedure.** In a nitrogen-filled glovebox, NiBr<sub>2</sub>·diglyme (8.8 mg, 0.040 mmol, 8.0%), ligand **1** (18.8 mg, 0.050 mmol, 10%; Run 1: (*S,S*)-**1**; Run 2: (*R,R*)-**1**), the electrophile (0.50 mmol), and toluene (2.5 mL) were added to a 10-mL flask. The following materials were added in turn to a 4-mL vial: KO<sup>*t*</sup>-Bu (73 mg, 0.65 mmol, 1.3 equiv), *i*-BuOH (69  $\mu$ L, 0.75 mmol, 1.5 equiv), the aryl-(9-BBN) reagent (0.75 mmol, 1.5 equiv), and toluene (2.5 mL). The flask and the vial were each capped with a rubber septum, and the two mixtures were stirred for 10 min. Next, the vessels were removed from the glovebox and placed in a -5 °C bath, and the mixtures

were stirred for 10 min. The solution in the vial was then transferred by syringe to the slurry in the 10-mL flask, which was attached to a nitrogen-filled balloon. The reaction mixture was stirred at  $-5\text{ }^{\circ}\text{C}$  for 24 h (it turned orange after a few min). Next, the mixture was poured into a separatory funnel and washed with a saturated solution of sodium carbonate (5 mL; if the aqueous layer is very viscous, then distilled water (3 mL) was added). The aqueous phase was extracted with EtOAc (5 mL  $\times$  2), and the organic layers were combined and washed with brine (5 mL), dried over  $\text{Na}_2\text{SO}_4$ , and concentrated. The resulting residue was purified by flash chromatography.

Run 1: (*S,S*)-1. Run 2: (*R,R*)-1.

Practical note: For the cross-couplings illustrated in Table 2, flash chromatography was used to purify the products. However, it was sometimes difficult to remove a 9-BBN-derived impurity by flash chromatography, necessitating the use of more than one chromatography. It is more practical to run a preliminary flash chromatography and then a recrystallization; this effectively removes the impurity and simultaneously enriches the ee of the product.

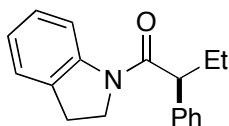

**1-(Indolin-1-yl)-2-phenylbutan-1-one (Table 2, entry 1).** 2-Chloro-1-(indolin-1-yl)butan-1-one (112 mg, 0.50 mmol) and 9-phenyl-9-borabicyclo[3.3.1]nonane (149 mg, 0.75 mmol) were used. Solvent system for chromatography: 7.5% EtOAc in pentane, then 1:1  $\text{CH}_2\text{Cl}_2$ :pentane $\rightarrow\text{CH}_2\text{Cl}_2$ . The product was isolated as a white solid.

Run 1: 108 mg (81% yield, 93% ee). Run 2: 101 mg (76% yield, 90% ee).

The ee was determined on an AS-H column (hexanes:isopropanol 99:1, flow 1.0 mL/min), with enantiomers eluting at 8.5 (major) and 10.1 (minor) min.

$^1\text{H}$  NMR (400 MHz,  $\text{CDCl}_3$ ):  $\delta$  8.33 (d, 1H,  $J = 8.1$  Hz), 7.38-7.29 (m, 4H), 7.26-7.21 (m, 1H), 7.19 (t, 1H,  $J = 7.8$  Hz), 7.12 (d, 1H,  $J = 7.3$  Hz), 6.99 (t, 1H,  $J = 7.4$  Hz), 4.15 (dt, 1H,  $J = 6.6, 10.3$  Hz), 3.84 (dt, 1H,  $J = 6.6, 10.3$  Hz), 3.58 (t, 1H,  $J = 7.2$  Hz), 3.19-3.09 (m, 1H), 3.07-2.96 (m, 1H), 2.28-2.16 (m, 1H), 1.87-1.74 (m, 1H), 0.93 (t, 3H,  $J = 7.3$  Hz);

$^{13}\text{C}$  NMR (100 MHz,  $\text{CDCl}_3$ ):  $\delta$  171.7, 143.5, 139.6, 131.3, 129.0, 128.3, 127.7, 127.3, 124.7, 123.8, 117.4, 54.1, 47.9, 28.22, 28.16, 12.7;

IR (film): 1646, 1559, 1540, 1457, 1406, 757, 668  $\text{cm}^{-1}$ ;

LRMS (EI) for  $\text{C}_{18}\text{H}_{20}\text{NO}$  ( $\text{M}+\text{H}$ ): calcd 266, found 266;

$[\alpha]_{\text{D}}^{23} +123$  ( $c$  1.20,  $\text{CHCl}_3$ ); 93% ee, from (*S,S*)-1.



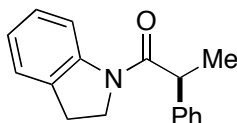

**1-(Indolin-1-yl)-2-phenylpropan-1-one (Table 2, entry 2).** 2-Chloro-1-(indolin-1-yl)propan-1-one (105 mg, 0.50 mmol) and 9-phenyl-9-borabicyclo[3.3.1]nonane (149 mg, 0.75 mmol) were used. Solvent system for chromatography: (1) 10% EtOAc in pentane; (2) 1:1 CH<sub>2</sub>Cl<sub>2</sub>:pentane→CH<sub>2</sub>Cl<sub>2</sub>. The product was isolated as a white solid.

Run 1: 113 mg (90% yield, 88% ee). Run 2: 109 mg (87% yield, 86% ee).

The ee was determined on an AS-H column (hexanes:isopropanol 99:1, flow 1.0 mL/min), with enantiomers eluting at 13.0 (major) and 16.9 (minor) min.

<sup>1</sup>H NMR (400 MHz, CDCl<sub>3</sub>): δ 8.33 (d, 1H, *J* = 8.1 Hz), 7.34-7.30 (m, 4H), 7.26-7.22 (m, 1H), 7.20 (t, 1H, *J* = 7.8 Hz), 7.13 (d, 1H, *J* = 7.2 Hz), 7.00 (t, 1H, *J* = 7.4 Hz), 4.10 (dt, 1H, *J* = 6.6, 10.3 Hz), 3.87 (q, 1H, *J* = 6.8 Hz), 3.77 (dt, 1H, *J* = 6.6, 10.3 Hz), 3.17-3.06 (m, 1H), 3.04-2.94 (m, 1H), 1.53 (d, 3H, *J* = 6.8 Hz);

<sup>13</sup>C NMR (100 MHz, CDCl<sub>3</sub>): δ 172.2, 143.5, 141.3, 131.3, 129.2, 127.7 (2), 127.2, 124.7, 123.9, 117.4, 47.8, 46.5, 28.2, 20.7;

IR (film): 1653, 1599, 1482, 1403, 1286, 755, 701 cm<sup>-1</sup>;

LRMS (EI) for C<sub>17</sub>H<sub>18</sub>NO (M+H): calcd 252, found 252;

[α]<sub>D</sub><sup>23</sup> -160 (*c* 1.06, CHCl<sub>3</sub>); 86% ee, from (*R,R*)-1.

**Reaction on a gram scale (Table 2, entry 2).** The reaction was carried out on a 5.0 mmol, rather than a 0.5 mmol, scale. The reaction temperature ranged from -20 °C to -5 °C for 20 h, and then it was maintained at -5 °C for the remaining 4 h.

After purification by flash chromatography (7.5% EtOAc in pentane), the product was obtained in 88% yield, as determined by <sup>1</sup>H NMR spectroscopy (vs. Ph<sub>3</sub>CH as a standard), and 92% ee. The internal standard was removed by flash chromatography (1%→15% EtOAc in pentane), and the product was recrystallized from MTBE and hexanes to give the desired compound as white crystals (0.882 g, 70%; >99% ee).

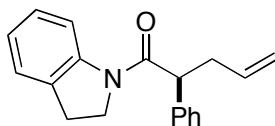

**1-(Indolin-1-yl)-2-phenylpent-4-en-1-one (Table 2, entry 3).** 2-Chloro-1-(indolin-1-yl)pent-4-en-1-one (118 mg, 0.50 mmol) and 9-phenyl-9-borabicyclo[3.3.1]nonane (149 mg, 0.75 mmol) were used. Solvent system for chromatography: (1) 5% EtOAc in pentane; (2) 3:1 CH<sub>2</sub>Cl<sub>2</sub>:pentane→CH<sub>2</sub>Cl<sub>2</sub>. The product was isolated as a white solid.

Run 1: 115 mg (83% yield, 91% ee). Run 2: 105 mg (76% yield, 90% ee).

The ee was determined on an AS-H column (hexanes:isopropanol 99:1, flow 1.0 mL/min), with enantiomers eluting at 11.0 (major) and 13.2 (minor) min.

<sup>1</sup>H NMR (400 MHz, CDCl<sub>3</sub>): δ 8.33 (d, 1H, *J* = 8.1 Hz), 7.37-7.29 (m, 4H), 7.27-7.22 (m, 1H), 7.19 (t, 1H, *J* = 7.8 Hz), 7.13 (d, 1H, *J* = 7.3 Hz), 6.99 (dt, 1H, *J* = 0.8, 7.4 Hz), 5.81 (tdd, 1H, *J* = 6.9,

10.2, 17.1 Hz), 5.07 (ddd, 1H,  $J = 1.4, 3.1, 17.1$  Hz), 5.01-4.97 (m, 1H), 4.14 (dt, 1H,  $J = 6.5, 10.3$  Hz), 3.83 (dt, 1H,  $J = 6.5, 10.4$  Hz), 3.78-3.73 (m, 1H), 3.14 (ddd, 1H,  $J = 6.5, 10.4, 16.6$  Hz), 3.06-2.92 (m, 2H), 2.54-2.45 (td, 1H,  $J = 6.9, 14.0$  Hz);

$^{13}\text{C}$  NMR (100 MHz,  $\text{CDCl}_3$ ):  $\delta$  170.8, 143.3, 138.8, 136.3, 131.1, 128.9, 128.1, 127.5, 127.2, 124.5, 123.7, 117.3, 116.7, 52.1, 47.7, 39.1, 28.0;

IR (film): 1646, 1597, 1479, 1407, 922, 757, 705  $\text{cm}^{-1}$ ;

LRMS (EI) for  $\text{C}_{19}\text{H}_{20}\text{NO}$  (M+H): calcd 278, found 278;

$[\alpha]_{\text{D}}^{23}$  -144 ( $c$  1.03,  $\text{CHCl}_3$ ); 90% ee, from (*R,R*)-1.

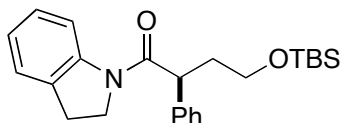

**4-(*tert*-Butyldimethylsilyloxy)-1-(indolin-1-yl)-2-phenylbutan-1-one (Table 2, entry 4).** 4-(*tert*-Butyldimethylsilyloxy)-2-chloro-1-(indolin-1-yl)butan-1-one (179 mg, 0.50 mmol) and 9-phenyl-9-borabicyclo[3.3.1]nonane (149 mg, 0.75 mmol) were used. Solvent system for chromatography: (1) 2%  $\rightarrow$  5% EtOAc in pentane; (2) passage through a plug of reverse-phase silica with 8:2  $\text{H}_2\text{O}:\text{MeCN}$ , followed by 2:8  $\text{H}_2\text{O}:\text{MeCN}$ . The product was isolated as a yellow solid.

Run 1: 152 mg (77% yield, 85% ee). Run 2: 162 mg (82% yield, 83% ee).

The ee was determined on an IC column (hexanes:isopropanol 99:1, flow 1.0 mL/min), with enantiomers eluting at 18.0 (major) and 14.7 (minor) min.

$^1\text{H}$  NMR (400 MHz,  $\text{CDCl}_3$ ):  $\delta$  8.32 (d, 1H,  $J = 8.1$  Hz), 7.38-7.28 (m, 4H), 7.26-7.22 (m, 1H), 7.19 (t, 1H,  $J = 7.8$  Hz), 7.13 (d, 1H,  $J = 7.1$  Hz), 6.99 (dt, 1H,  $J = 0.8, 7.4$  Hz), 4.18 (dt, 1H,  $J = 6.4, 10.4$  Hz), 4.08 (t, 1H,  $J = 7.2$  Hz), 3.86 (dt, 1H,  $J = 6.6, 10.4$  Hz), 3.69-3.62 (m, 1H), 3.58-3.51 (m, 1H), 3.19-3.09 (m, 1H), 3.07-2.97 (m, 1H), 2.45-2.35 (m, 1H), 1.99-1.89 (m, 1H), 0.91 (s, 9H), 0.02 (d, 6H,  $J = 4.9$  Hz);

$^{13}\text{C}$  NMR (100 MHz,  $\text{CDCl}_3$ ):  $\delta$  171.6, 143.5, 139.4, 131.4, 129.0, 128.5, 127.7, 127.3, 124.6, 123.8, 117.4, 60.5, 47.9, 47.6, 37.8, 28.1, 26.1, 18.4, -5.2;

IR (film): 1654, 1482, 1401, 1258, 1101, 834, 754  $\text{cm}^{-1}$ ;

LRMS (EI) for  $\text{C}_{24}\text{H}_{33}\text{NO}_2\text{Si}$  (M): calcd 395, found 395;

$[\alpha]_{\text{D}}^{23}$  -82 ( $c$  1.06,  $\text{CHCl}_3$ ); 83% ee, from (*R,R*)-1.

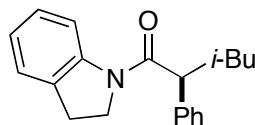

**1-(Indolin-1-yl)-4-methyl-2-phenylpentan-1-one (Table 2, entry 5).** 2-Chloro-1-(indolin-1-yl)-4-methylpentan-1-one (112 mg, 0.50 mmol) and 9-phenyl-9-borabicyclo[3.3.1]nonane (149 mg, 0.75 mmol) were used. Solvent system for chromatography: (1) 5% EtOAc in pentane; (2) 1:1  $\text{CH}_2\text{Cl}_2$ :pentane  $\rightarrow$   $\text{CH}_2\text{Cl}_2$ . The product was isolated as a white solid.

Run 1: 128 mg (87% yield, 86% ee). Run 2: 119 mg (81% yield, 84% ee).

The ee was determined on an AS-H column (hexanes:isopropanol 99:1, flow 1.0 mL/min), with enantiomers eluting at 8.9 (major) and 11.3 (minor) min.

$^1\text{H}$  NMR (400 MHz,  $\text{CDCl}_3$ ):  $\delta$  8.32 (d, 1H,  $J = 8.1$  Hz), 7.38-7.29 (m, 4H), 7.26-7.22 (m, 1H), 7.19 (t, 1H,  $J = 7.8$  Hz), 7.13 (d, 1H,  $J = 7.3$  Hz), 6.99 (t, 1H,  $J = 7.4$  Hz), 4.17 (dt, 1H,  $J = 6.7, 10.3$  Hz), 3.90 (dt, 1H,  $J = 6.5, 10.3$  Hz), 3.80 (t, 1H,  $J = 7.2$  Hz), 3.21-3.11 (m, 1H), 3.09-2.99 (m, 1H), 2.13 (td, 1H,  $J = 6.7, 13.8$  Hz), 1.68-1.51 (m, 2H), 0.94 (dd, 6H,  $J = 6.4, 15.7$  Hz);

$^{13}\text{C}$  NMR (100 MHz,  $\text{CDCl}_3$ ):  $\delta$  171.7, 143.5, 139.8, 131.3, 129.0, 128.3, 127.7, 127.2, 124.6, 123.8, 117.5, 49.8, 47.9, 44.2, 28.2, 25.9, 22.9;

IR (film): 2955, 1658, 1600, 1481, 1402, 754, 701  $\text{cm}^{-1}$ ;

LRMS (EI) for  $\text{C}_{20}\text{H}_{24}\text{NO}$  (M+H): calcd 294, found 294;

$[\alpha]_{\text{D}}^{23} +123$  (c 1.00,  $\text{CHCl}_3$ ); 86% ee, from (S,S)-1.

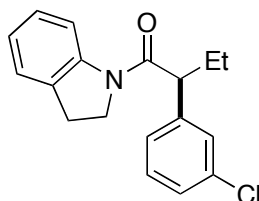

**2-(3-Chlorophenyl)-1-(indolin-1-yl)butan-1-one (Table 2, entry 6).** 2-Chloro-1-(indolin-1-yl)butan-1-one (112 mg, 0.50 mmol) and 9-(3-chlorophenyl)-9-borabicyclo[3.3.1]nonane (149 mg, 0.75 mmol) were used, as well as 10 mol%  $\text{NiBr}_2$ -diglyme (17.6 mg, 0.050 mmol) and 12.5 mol% diamine ligand (23.5 mg, 0.062 mmol). Solvent system for chromatography: (1) 7.5% EtOAc in pentane; (2) 2:1  $\text{CH}_2\text{Cl}_2$ :pentane to  $\text{CH}_2\text{Cl}_2$ . The product was isolated as a white solid.

Run 1: 118 mg (79% yield, 93% ee). Run 2: 111 mg (74% yield, 91% ee).

The ee was determined on an AD-H column (hexanes:isopropanol 99:1, flow 1.0 mL/min), with enantiomers eluting at 19.8 (major) and 17.3 (minor) min.

$^1\text{H}$  NMR (400 MHz,  $\text{CDCl}_3$ ):  $\delta$  8.32 (d, 1H,  $J = 8.1$  Hz), 7.36-7.34 (m, 1H), 7.26-7.17 (m, 4H), 7.16-7.12 (d, 1H,  $J = 7.2$  Hz), 7.00 (dt, 1H,  $J = 1.0, 7.4$  Hz), 4.15 (dt, 1H,  $J = 6.6, 10.3$  Hz), 3.86 (dt, 1H,  $J = 6.5, 10.3$  Hz), 3.56 (t, 1H,  $J = 7.3$  Hz), 3.21-3.11 (m, 1H), 3.11-3.01 (m, 1H), 2.26-2.14 (m, 1H), 1.85-1.73 (m, 1H), 0.93 (t, 3H,  $J = 7.4$  Hz);

$^{13}\text{C}$  NMR (100 MHz,  $\text{CDCl}_3$ ):  $\delta$  170.8, 143.2, 141.4, 134.6, 131.1, 130.1, 128.3, 127.6, 127.4, 126.3, 124.5, 123.9, 117.3, 53.5, 47.8, 28.04, 27.98, 12.4;

IR (film): 1646, 1596, 1479, 1407, 1258, 756, 668  $\text{cm}^{-1}$ ;

LRMS (EI) for  $\text{C}_{18}\text{H}_{19}\text{ClNO}$  (M+H): calcd 300, found 300;

$[\alpha]_{\text{D}}^{23} +136$  (c 1.00,  $\text{CHCl}_3$ ); 93% ee, from (S,S)-1.

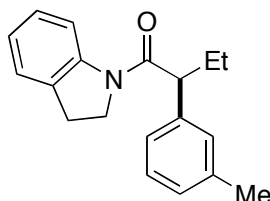

**1-(Indolin-1-yl)-2-m-tolylbutan-1-one (Table 2, entry 7).** 2-Chloro-1-(indolin-1-yl)butan-1-one (112 mg, 0.50 mmol) and 9-(3-methylphenyl)-9-borabicyclo[3.3.1]nonane (159 mg, 0.75 mmol) were used. Solvent system for chromatography: (1) 7.5% EtOAc in pentane; (2) 1:1 CH<sub>2</sub>Cl<sub>2</sub>:pentane to CH<sub>2</sub>Cl<sub>2</sub>. The product was isolated as a white solid.

Run 1: 112 mg (80% yield, 93% ee). Run 2: 121 mg (87% yield, 92% ee).

The ee was determined on an AS-H column (hexanes:isopropanol 99:1, flow 1.0 mL/min), with enantiomers eluting at 9.4 (major) and 10.9 (minor) min.

<sup>1</sup>H NMR (400 MHz, CDCl<sub>3</sub>): δ 8.34 (d, 1H, *J* = 8.1 Hz), 7.23-7.17 (m, 2H), 7.17-7.10 (m, 3H), 7.05 (d, 1H, *J* = 7.4 Hz), 6.99 (t, 1H, *J* = 7.4 Hz), 4.14 (dt, 1H, *J* = 6.6, 10.3 Hz), 3.86 (dt, 1H, *J* = 6.4, 10.4 Hz), 3.54 (t, 1H, *J* = 7.3 Hz), 3.19-3.09 (m, 1H), 3.07-2.97 (m, 1H), 2.33 (s, 3H), 2.26-2.14 (m, 1H), 1.84-1.72 (m, 1H), 0.93 (t, 3H, *J* = 7.3 Hz);

<sup>13</sup>C NMR (100 MHz, CDCl<sub>3</sub>): δ 171.6, 143.4, 139.3, 138.6, 131.2, 128.59, 128.57, 127.9, 127.5, 125.4, 124.5, 123.6, 117.3, 53.9, 47.7, 28.1, 28.0, 21.5, 12.6;

IR (film): 1653, 1600, 1481, 1401, 1339, 755 cm<sup>-1</sup>;

LRMS (EI) for C<sub>19</sub>H<sub>22</sub>NO (M+H): calcd 280, found 280;

[α]<sub>D</sub><sup>23</sup> -136 (c 1.11, CHCl<sub>3</sub>); 92% ee, from (*R,R*)-1.

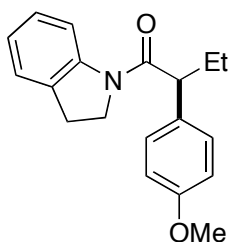

**1-(Indolin-1-yl)-2-(4-methoxyphenyl)butan-1-one (Table 2, entry 8).** 2-Chloro-1-(indolin-1-yl)butan-1-one (112 mg, 0.50 mmol) and 9-(4-methoxyphenyl)-9-borabicyclo[3.3.1]nonane (172 mg, 0.75 mmol) were used. Solvent system for chromatography: (1) 10% EtOAc in pentane; (2) 1:1 CH<sub>2</sub>Cl<sub>2</sub>:pentane→CH<sub>2</sub>Cl<sub>2</sub> (twice). The product was isolated as a white solid.

Run 1: 116 mg (79% yield, 91% ee). Run 2: 120 mg (81% yield, 90% ee).

The ee was determined on an AS-H column (hexanes:isopropanol 99:1, flow 1.0 mL/min), with enantiomers eluting at 18.8 (major) and 21.7 (minor) min.

<sup>1</sup>H NMR (400 MHz, CDCl<sub>3</sub>): δ 8.32 (m, 1H), 7.27-7.23 (m, 2H), 7.21-7.16 (m, 1H), 7.12 (d, 1H, *J* = 7.3 Hz), 6.98 (dt, 1H, *J* = 0.9, 7.4 Hz), 6.87-6.83 (m, 2H), 4.13 (dt, 1H, *J* = 6.6, 10.3 Hz), 3.90-3.82 (m, 1H), 3.78 (s, 3H), 3.52 (t, 1H, *J* = 7.3 Hz), 3.19-3.09 (m, 1H), 3.07-2.97 (m, 1H), 2.23-2.12 (m, 1H), 1.82-1.71 (m, 1H), 0.92 (t, 3H, *J* = 7.3 Hz);

<sup>13</sup>C NMR (100 MHz, CDCl<sub>3</sub>): δ 172.0, 158.8, 143.6, 131.6, 131.3, 129.3, 127.7, 124.6, 123.8, 117.4, 114.3, 55.5, 53.1, 47.9, 28.20, 28.16, 12.6;

IR (film): 1653, 1511, 1481, 1401, 1252, 1178, 1033, 756  $\text{cm}^{-1}$ ;  
LRMS (EI) for  $\text{C}_{19}\text{H}_{22}\text{NO}_2$  (M+H): calcd 296, found 296;  
 $[\alpha]_{\text{D}}^{23} +126$  (c 1.15,  $\text{CHCl}_3$ ); 91% ee, from (S,S)-1.

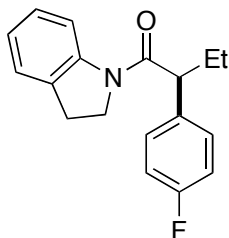

**2-(4-Fluorophenyl)-1-(indolin-1-yl)butan-1-one (Table 2, entry 9).** 2-Chloro-1-(indolin-1-yl)butan-1-one (112 mg, 0.50 mmol) and 9-(4-fluorophenyl)-9-borabicyclo[3.3.1]nonane (166 mg, 0.75 mmol) were used. Solvent system for chromatography: (1) 7.5% EtOAc in pentane; (2) 1:1  $\text{CH}_2\text{Cl}_2$ :pentane $\rightarrow\text{CH}_2\text{Cl}_2$  (three times). The product was isolated as a white solid.

Run 1: 101 mg (71% yield, 94% ee). Run 2: 99 mg (70% yield, 93% ee).

The ee was determined on an AS-H column (hexanes:isopropanol 99:1, flow 1.0 mL/min), with enantiomers eluting at 10.7 (major) and 13.1 (minor) min.

$^1\text{H}$  NMR (400 MHz,  $\text{CDCl}_3$ ):  $\delta$  8.31 (d, 1H,  $J = 8.1$  Hz), 7.34-7.28 (m, 2H), 7.23-7.17 (m, 1H), 7.15-7.11 (m, 1H), 7.04-6.97 (m, 3H), 4.15 (dt, 1H,  $J = 6.6$  Hz,  $J = 10.3$  Hz), 3.85 (dt, 1H,  $J = 6.5$  Hz, 10.3 Hz), 3.57 (t, 1H,  $J = 7.3$  Hz), 3.20-3.10 (m, 1H), 3.09-2.99 (m, 1H), 2.24-2.13 (m, 1H), 1.83-1.71 (m, 1H), 0.92 (t, 3H,  $J = 7.3$  Hz);

$^{13}\text{C}$  NMR (100 MHz,  $\text{CDCl}_3$ ):  $\delta$  171.4, 161.9 (d,  $J = 244$  Hz), 143.2, 135.1 (d,  $J = 3.3$  Hz), 131.1, 129.7, 127.6, 124.5, 123.8, 117.3, 115.7 (d,  $J = 21$  Hz), 53.0, 47.7, 28.1, 28.0, 12.4;

IR (film): 1653, 1600, 1501, 1482, 1401, 1223, 756;

LRMS (EI) for  $\text{C}_{18}\text{H}_{19}\text{FNO}$  (M+H): calcd 284, found 284;

$[\alpha]_{\text{D}}^{23} +131$  (c 0.99,  $\text{CHCl}_3$ ); 94% ee, from (S,S)-1.

**Eq 5.** In a nitrogen-filled glovebox,  $\text{NiBr}_2 \cdot \text{diglyme}$  (7.0 mg, 0.032 mmol, 8.0%), ligand (*R,R*)-1 (15.1 mg, 0.040 mmol, 10%), 2-chloro-1-(indolin-1-yl)propan-1-one (83.4 mg, 0.40 mmol), *n*-tetradecane (60.9 mg, 0.31 mmol, 0.77 equiv; internal standard), and toluene (2.0 mL) were added to a 10-mL flask. The following materials were added in turn to a 4-mL vial:  $\text{KO}^t\text{-Bu}$  (58.3 mg, 0.52 mmol, 1.3 equiv), *i*-BuOH (44.6 mg, 0.60 mmol, 1.5 equiv), Ph-(9-BBN) (119 mg, 0.60 mmol, 1.5 equiv), and toluene (2.0 mL). The flask and the vial were each capped with a rubber septum, and the two mixtures were stirred for 10 min. Next, the vessels were removed from the glovebox and placed in a  $-5$   $^\circ\text{C}$  bath, and the mixtures were stirred for 10 min. The solution in the vial was then transferred by syringe to the slurry in the 10-mL flask, which was attached to an argon-filled manifold. The reaction mixture was stirred at  $-5$   $^\circ\text{C}$  for 11 h, at which time an aliquot was removed and passed through a plug of silica (washed with  $\text{Et}_2\text{O}$ ).

GC analysis showed 86% conversion of the starting material, and HPLC analysis showed a starting-material ee of 54% and a product ee of 90% (AS-H column (hexanes:isopropanol 99:1,

flow 1.0 mL/min); starting material: 21.5 (major) and 30.4 (minor) min; product: 14.1 (minor) and 18.2 (major) min).

**Eq 6 and 7.** In a nitrogen-filled glovebox, NiBr<sub>2</sub>·diglyme (8.8 mg, 0.040 mmol, 8.0%), ligand (*S,S*)-1 (18.8 mg, 0.050 mmol, 10%), 2-chloro-1-(indolin-1-yl)propan-1-one (105 mg; 0.50 mmol; eq 6: *R* enantiomer, 95% ee, eq 7: *S* enantiomer, 95% ee), *n*-tetradecane (99 mg, 0.50 mmol, 1.0 equiv), and toluene (2.5 mL) were added to a 10-mL flask. The following materials were added in turn to a 4-mL vial: KO<sup>*t*</sup>-Bu (73 mg, 0.65 mmol, 1.3 equiv), *i*-BuOH (55.5 mg, 0.75 mmol, 1.5 equiv), Ph-(9-BBN) (149 mg, 0.75 mmol, 1.5 equiv), and toluene (2.5 mL). The flask and the vial were each capped with a rubber septum, and the two mixtures were stirred for 10 min. Next, the vessels were removed from the glovebox and placed in a -5 °C bath, and the mixtures were stirred for 10 min. The solution in the vial was then transferred by syringe to the slurry in the 10-mL flask, which was attached to an argon-filled manifold. The reaction mixture was stirred at -5 °C for 12 h, at which time an aliquot was removed and passed through a plug of silica (washed with Et<sub>2</sub>O).

Eq 6: GC analysis showed 67% conversion of the starting material, and HPLC analysis showed a starting-material ee of 95% and a product ee of 88% (AS-H column (hexanes:isopropanol 99:1, flow 1.0 mL/min); starting material: 20.7 (major) and 28.3 (minor) min; product: 13.6 (major) and 17.1 (minor) min).

Eq 7: GC analysis showed 67% conversion of the starting material, and HPLC analysis showed a starting-material ee of 95% and a product ee of 88% (AS-H column (hexanes:isopropanol 99:1, flow 1.0 mL/min); starting material: 20.7 (minor) and 28.3 (major) min; product: 13.6 (major) and 17.1 (minor) min).

## V. Functionalization Reactions (eq 3 and eq 4) and Assignment of Absolute Configuration

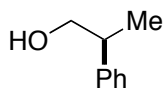

**(*S*)-(-)-2-Phenyl-1-propanol [37778-99-7] (eq 3).**<sup>3</sup> A solution of *n*-BuLi (1.6 M solution in hexanes; 2.44 mL, 3.9 mmol, 3.9 equiv) was added dropwise to a solution of diisopropylamine (580 μL, 4.1 mmol, 4.1 equiv) in THF (15 mL) at 0 °C. The mixture was stirred for 15 min, then ammonia·borane (123 mg, 4.0 mmol, 4.0 equiv) was added. The resulting mixture was stirred at 0 °C for 15 min, and then it was warmed to room temperature. A solution of (*S*)-1-(indolin-1-yl)-2-phenylpropan-1-one (recrystallized; >99% ee; 251 mg, 1.0 mmol, 1.0 equiv) in THF (15 mL) was added, and then the reaction mixture was heated to reflux

(3) Myers, A. G.; Yang, B. H.; Chen, H.; McKinstry, L.; Kopecky, D. J.; Gleason, J. L. *J. Am. Chem. Soc.* **1997**, *119*, 6496–6511.

for 24 h. Next, the mixture was cooled to 0 °C, and the reaction was quenched by the addition of aqueous HCl (1 M; 20 mL). The layers were separated, and the aqueous layer was extracted with Et<sub>2</sub>O (10 mL × 4). The combined organic layers were washed with HCl (1 M; 5 mL), NaOH (3 M; 5 mL), and brine (10 mL). The organic layer was dried over Na<sub>2</sub>SO<sub>4</sub> and concentrated. The residue was purified by flash chromatography (10%→80% Et<sub>2</sub>O in hexanes), which furnished the product as a clear, colorless oil.

Run 1: 109 mg (80% yield, >99% ee); Run 2: 116 mg (85% yield, >99% ee).

The ee was determined on an AS-H column (hexanes:isopropanol 99:1, flow 1.0 mL/min), with enantiomers eluting at 17.0 (major) and 18.6 (minor) min.

<sup>1</sup>H NMR (400 MHz, CDCl<sub>3</sub>): δ 7.36-7.31 (m, 2H), 7.25-7.22 (m, 3H), 3.74-3.69 (m, 2H), 3.01-2.91 (m, 1H), 1.28 (d, 3H, *J* = 7.0 Hz);

[α]<sup>24</sup><sub>D</sub> -13.6 (*c* 1.00, CHCl<sub>3</sub>); >99% ee. Lit.<sup>4</sup> [α]<sup>22</sup><sub>D</sub> -12 (*c* 1.00, CHCl<sub>3</sub>), 89% ee (S).

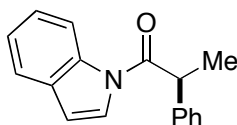

**(S)-1-(1H-Indol-1-yl)-2-phenylpropan-1-one (eq 4).** Toluene (7.5 mL) and DDQ (460 mg, 2.03 mmol, 1.30 equiv) were added to a Schlenk flask that contained (S)-1-(indolin-1-yl)-2-phenylpropan-1-one (recrystallized; >99% ee; 392 mg, 1.56 mmol) under argon. The resulting solution was heated to reflux overnight. The solution was then diluted with EtOAc (15 mL) and washed with water (10 mL). The aqueous layer was extracted with EtOAc (15 mL), and the combined organic layers were washed with brine (12 mL), dried over MgSO<sub>4</sub>, and concentrated. The residue was purified by flash chromatography (2%→20% EtOAc in hexanes), which furnished the product as a white solid (351 mg, 90%).

<sup>1</sup>H NMR (400 MHz, CDCl<sub>3</sub>): δ 8.53 (d, 1H, *J* = 8.3 Hz), 7.43 (d, 1H, *J* = 7.8 Hz), 7.34 (d, 1H, *J* = 3.8 Hz), 7.32-7.22 (m, 5H), 7.21-7.14 (m, 2H), 6.42 (d, 1H, *J* = 3.8 Hz), 4.35 (q, 1H, *J* = 6.9 Hz), 1.57 (d, 3H, *J* = 6.8 Hz);

<sup>13</sup>C NMR (100 MHz, CDCl<sub>3</sub>): δ 172.5, 141.1, 136.1, 130.4, 129.5, 127.6, 127.4, 125.4, 125.1, 124.0, 120.9, 117.1, 109.3, 46.5, 20.5;

IR (film): 1701, 1540, 1451, 1352, 1292, 1208, 910, 750, 700 cm<sup>-1</sup>;

LRMS (EI) for C<sub>17</sub>H<sub>15</sub>NO (M): calcd 249, found 249;

[α]<sup>18</sup><sub>D</sub> +101 (*c* 0.87, (CH<sub>3</sub>)<sub>2</sub>CO); >99% ee, based on the ee of the acid (after hydrolysis).

---

(4) Dai, X.; Strotman, N. A.; Fu, G. C. *J. Am. Chem. Soc.* **2008**, *130*, 3302–3303.

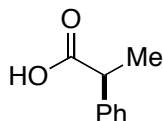

**(S)-2-Phenylpropionic acid [7782-24-3] (eq 4).** A solution of aqueous  $\text{H}_2\text{O}_2$  (30% w/w; 1 mL) and  $\text{LiOH}\cdot\text{H}_2\text{O}$  (192 mg, 4.58 mmol, 3.25 equiv) were added to a solution of (S)-1-(1*H*-indol-1-yl)-2-phenylpropan-1-one (351 mg, 1.41 mmol) in THF (14 mL) and  $\text{H}_2\text{O}$  (4 mL) at 0 °C. The resulting suspension was allowed to warm to room temperature and stirred overnight. Next, the reaction was quenched by the addition of saturated sodium thiosulfate (8 mL) and saturated sodium bicarbonate (10 mL). The mixture was stirred for 15 min, and then the THF was removed by rotary evaporation, and the aqueous layer was extracted with  $\text{CH}_2\text{Cl}_2$  (10 mL). Next, the aqueous layer was acidified (pH<5) with HCl (1 M) and extracted with EtOAc (15 mL  $\times$  4). The combined organic layers were dried over  $\text{Na}_2\text{SO}_4$  and concentrated. The residue was purified by flash chromatography (2% $\rightarrow$ 20% EtOAc in hexanes), which furnished the product (161 mg, 76%) as a brown oil.

The ee was determined on an AD-H column (hexanes:isopropanol 97:3, flow 1.0 mL/min), with enantiomers eluting at 29.9 (minor) and 34.2 (major) min.

$^1\text{H}$  NMR (400 MHz,  $\text{CDCl}_3$ ):  $\delta$  12.01 (br s, 1H), 7.41-7.36 (m, 4H), 7.36-7.29 (m, 1H), 3.74 (q, 1H,  $J = 7.2$  Hz), 1.52 (d, 3H,  $J = 7.2$  Hz);

$[\alpha]_{\text{D}}^{18} +59$  ( $c$  1.01,  $\text{CHCl}_3$ ); >99% ee. Lit.<sup>5</sup>  $[\alpha]_{\text{D}}^{20} +72$  ( $c$  1.0,  $\text{CHCl}_3$ ), 96% ee (S).

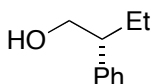

**(R)-(-)-2-Phenyl-1-butanol [16460-75-6].<sup>6</sup>** A solution of *n*-BuLi (1.6 M solution in hexanes; 0.83 mL, 1.33 mmol, 3.9 equiv) was added dropwise to a solution of diisopropylamine (200  $\mu\text{L}$ , 1.43 mmol, 4.2 equiv) in THF (5 mL) at 0 °C. The mixture was stirred for 15 min, then ammonia-borane (44 mg, 1.2 mmol, 3.5 equiv) was added. The resulting mixture was stirred at 0 °C for 15 min, and then it was warmed to room temperature. A solution of (R)-1-(indolin-1-yl)-2-phenylbutan-1-one (90% ee; 89 mg, 0.34 mmol, 1.0 equiv) in THF (5 mL) was added, and then the reaction mixture was heated to reflux for 22 h. Next, the mixture was cooled to 0 °C, and the reaction was quenched by the addition of aqueous HCl (1 M; 5 mL). The layers were separated, and the aqueous layer was extracted with  $\text{Et}_2\text{O}$  (3 mL  $\times$  4). The combined organic layers were washed with HCl (1 M; 3 mL), NaOH (2 M; 4 mL), and brine (3 mL). The organic layer was dried over  $\text{Na}_2\text{SO}_4$  and concentrated. The residue was purified by flash chromatography (8% $\rightarrow$ 60%  $\text{Et}_2\text{O}$  in hexanes), then washed with HCl (1 M; 3 mL; to remove an indoline impurity), thereby producing the alcohol as a yellow oil (25 mg, 49%).

(5) Coulbeck, E.; Eames, J. *Tetrahedron: Asymmetry* **2008**, *19*, 2223–2233.

(6) Myers, A. G.; Yang, B. H.; Chen, H.; McKinstry, L.; Kopeccky, D. J.; Gleason, J. L. *J. Am. Chem. Soc.* **1997**, *119*, 6496–6511.



The ee was determined to be 90% on an AD-H column (hexanes:isopropanol 99:1, flow 1.0 mL/min), with enantiomers eluting at 14.3 (major) and 15.7 (minor) min.

$^1\text{H}$  NMR (400 MHz,  $\text{CDCl}_3$ ):  $\delta$  7.32-7.27 (m, 2H), 7.22-7.16 (m, 3H), 3.75-3.65 (m, 2H), 2.67-2.62 (m, 1H), 1.76-1.68 (m, 1H), 1.62-1.50 (m, 2H), 0.80 (t, 3H,  $J = 7.4$  Hz);

$[\alpha]_{\text{D}}^{23} -15.1$  ( $c$  0.95,  $\text{CHCl}_3$ ); 90% ee. Lit.  $[\alpha]_{\text{D}}^{23} -15.0 \pm 2.5$  ( $c$  1.00,  $\text{CHCl}_3$ ), 92% ee (R);<sup>7</sup>  $[\alpha]_{\text{D}}^{22} +18$  ( $c$  1.50,  $\text{CHCl}_3$ ), 99% ee (S).<sup>8</sup>

## VI. $^1\text{H}$ NMR Spectra

---

(7) Matsubara, S.; Yamamoto, H.; Oshima, K. *Angew. Chem., Int. Ed.* **2002**, *41*, 2837–2840

(8) Dai, X.; Strotman, N. A.; Fu, G. C. *J. Am. Chem. Soc.* **2008**, *130*, 3302–3303.

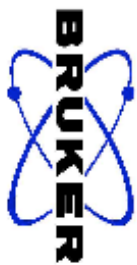

Current Data Parameters  
 NAME V-066  
 EXPNO 5  
 PROCNO 1

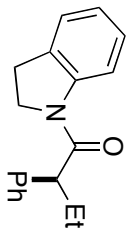

Table 2, entry 1

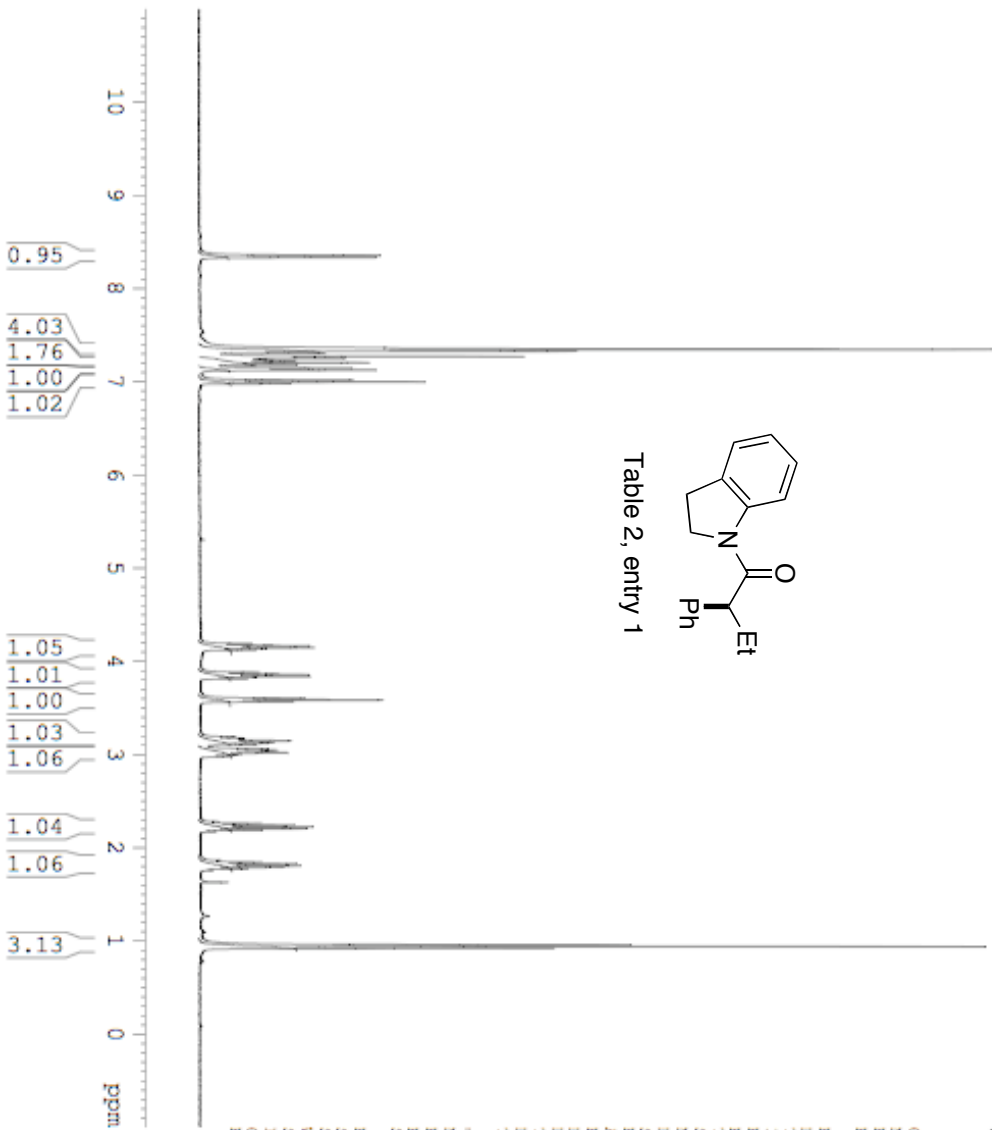

F2 - Acquisition Parameters  
 Date\_ 20100107  
 Time 20.15  
 INSTRUM spect  
 PROBRD 5 mm QNP 1H/13  
 PULPROG zgpg30  
 ID 65536  
 SOLVENT CDCl3  
 NS 16  
 DS 2  
 SMH 8278.146 Hz  
 FIDRES 0.126314 Hz  
 AQ 3.9584243 sec  
 RG 362  
 DE 60.400 usec  
 TE 292.2 K  
 D1 1.00000000 sec  
 TD0 1

CHANNEL F1  
 NUCL1 13C  
 P1 14.00 usec  
 PL1 0.00 dB  
 SFO1 400.1324710 MHz  
 F2 - Processing parameters  
 SI 65536  
 SF 400.1300074 MHz  
 NDM EM  
 SSB 0  
 LB 0.30 Hz  
 GB 0  
 PC 1.00

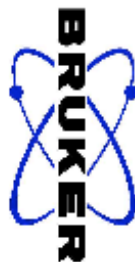

Current Data Parameters  
NAME V-062  
EXPNO 2  
PROCNO 1

F2 - Acquisition Parameters

Date\_ 20090814  
Time 9.35  
INSTRUM spect  
PROBHD 5 mm QNP 1H/13  
PULPROG zg30  
ID 65536  
SOLVENT CDCl3  
NS 16  
DS 2  
SMH 8278.146 Hz  
FIDRES 0.126314 Hz  
AQ 3.9584243 sec  
RG 362  
DW 60.400 usec  
DE 6.00 usec  
TE 291.2 K  
D1 1.00000000 sec  
TD0 1

===== CHANNEL f1 =====

NUC1 1H  
P1 14.00 usec  
PL1 0.00 dB  
SFO1 400.1324710 MHz

F2 - Processing parameters

SI 65536  
SF 400.1300074 MHz  
WDW EM  
SSB 0  
LB 0.30 Hz  
GB 0  
PC 1.00

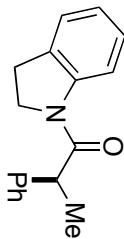

Table 2, entry 2

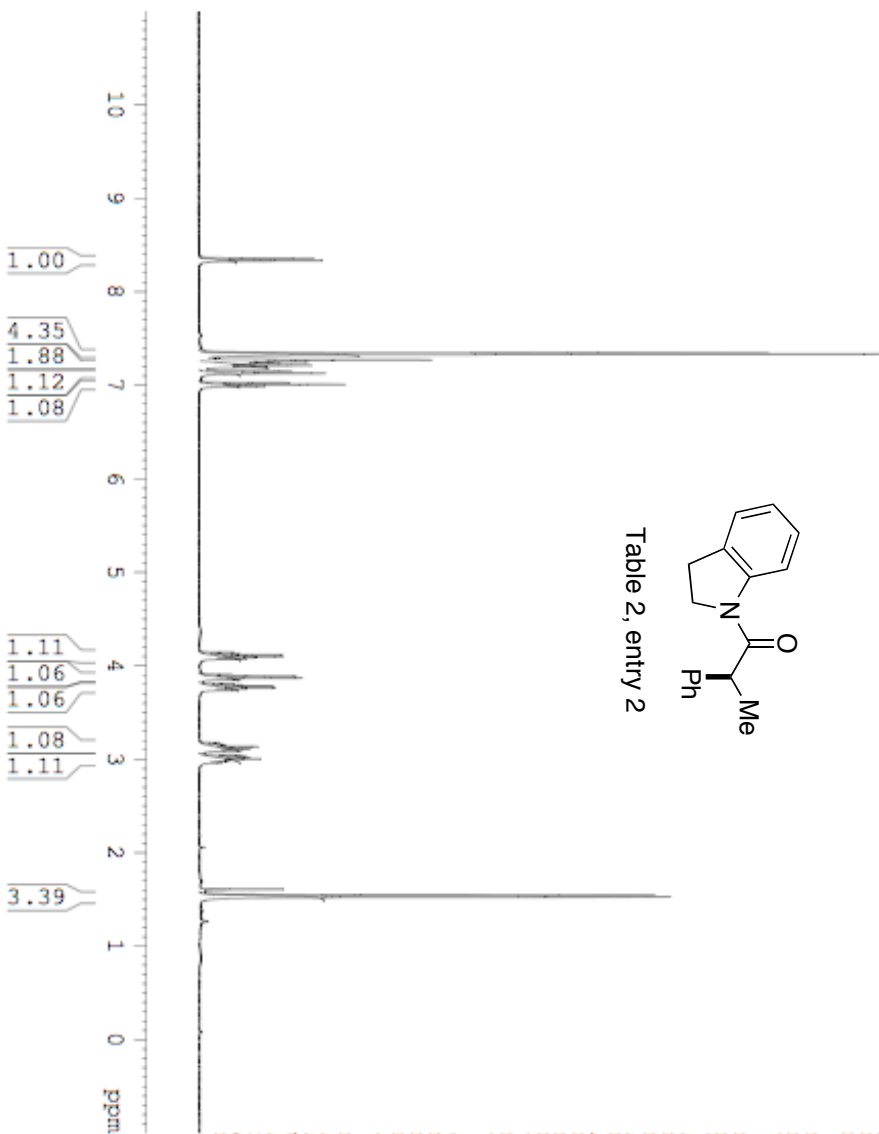

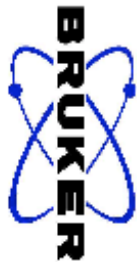

Current Data Parameters  
 NAME V-080  
 EXPNO 5  
 PROCNO 1

F2 - Acquisition Parameters  
 Date\_ 20100111  
 Time 20.24  
 INSTRUM spect  
 PROBRD 5 mm QNP 1H/13  
 PULPROG zg30  
 ID 65536  
 SOLVENT CDCl3  
 NS 16  
 DS 2  
 SMH 8278.146 Hz  
 FIDRES 0.126314 Hz  
 AQ 3.9584243 sec  
 RG 512  
 DW 60.400 usec  
 DE 6.00 usec  
 TE 292.2 K  
 D1 1.00000000 sec  
 TDO 1

CHANNEL f1  
 NUC1 1H  
 P1 14.00 usec  
 PL1 0.00 dB  
 SFO1 400.1324710 MHz

F2 - Processing parameters  
 SI 65536  
 SF 400.1300074 MHz  
 WDW EM  
 SSB 0  
 LB 0.30 Hz  
 GB 0  
 PC 1.00

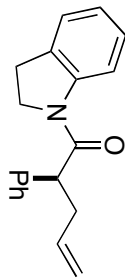

Table 2, entry 3

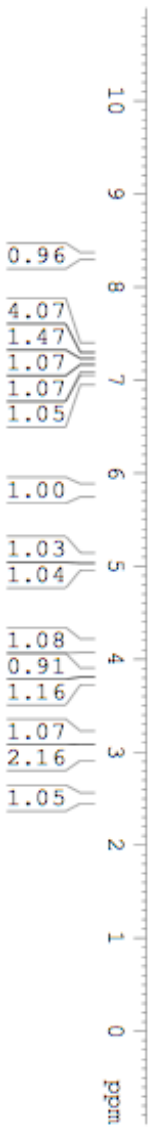

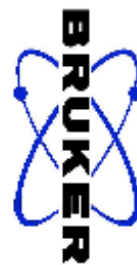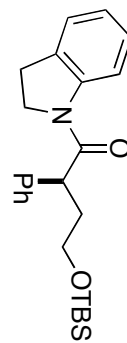

Table 2, entry 4

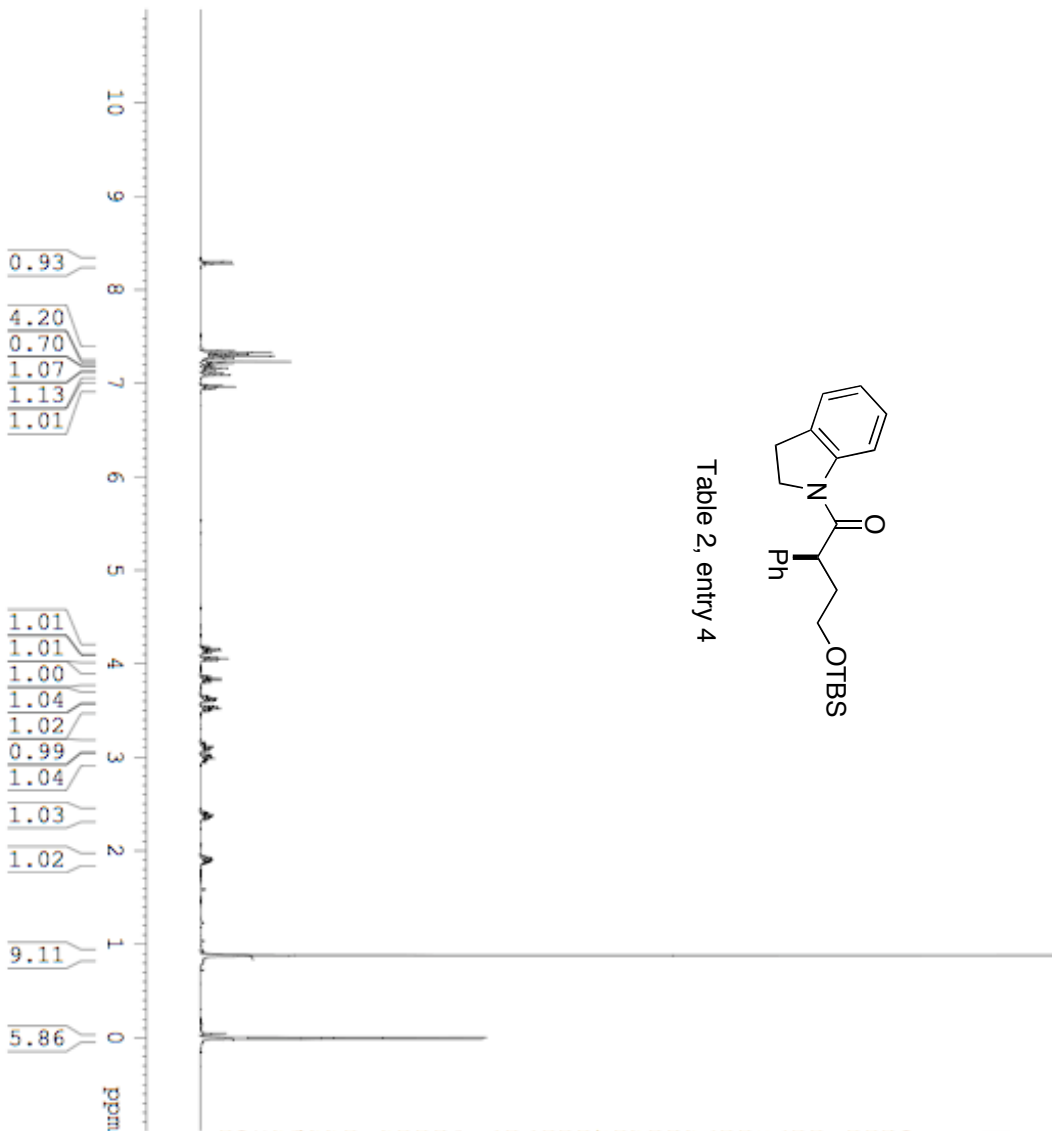

```

Current Data Parameters
NAME          V-133
EXPNO        3
PROCNO       1

F2 - Acquisition Parameters
Date_        2010106
Time         9.43
INSTRUM     spect
PROBHD      5 mm QNP 1H/13
PULPROG     zg30
TD          65536
SOLVENT     CDCl3
NS          16
DS          2
SFO1        8279.146 Hz
SFO2        0.126314 Hz
FIDRES      3.9384243 sec
AQ          203.2
RG          60.400 usec
DM          6.00 usec
DE          292.2 K
TE          1.00000000 sec
D1          1
TD0         1

===== CHANNEL f1 =====
NUC1         1H
P1          14.00 usec
PL1         0.00 dB
SFO1        400.1324710 MHz

F2 - Processing parameters
SI          65536
SF          400.1300220 MHz
WDW         EM
SSB         0
LB          0.30 Hz
GB          0
PC          1.00
  
```

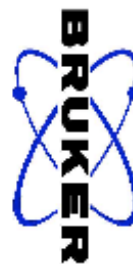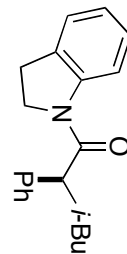

Table 2, entry 5

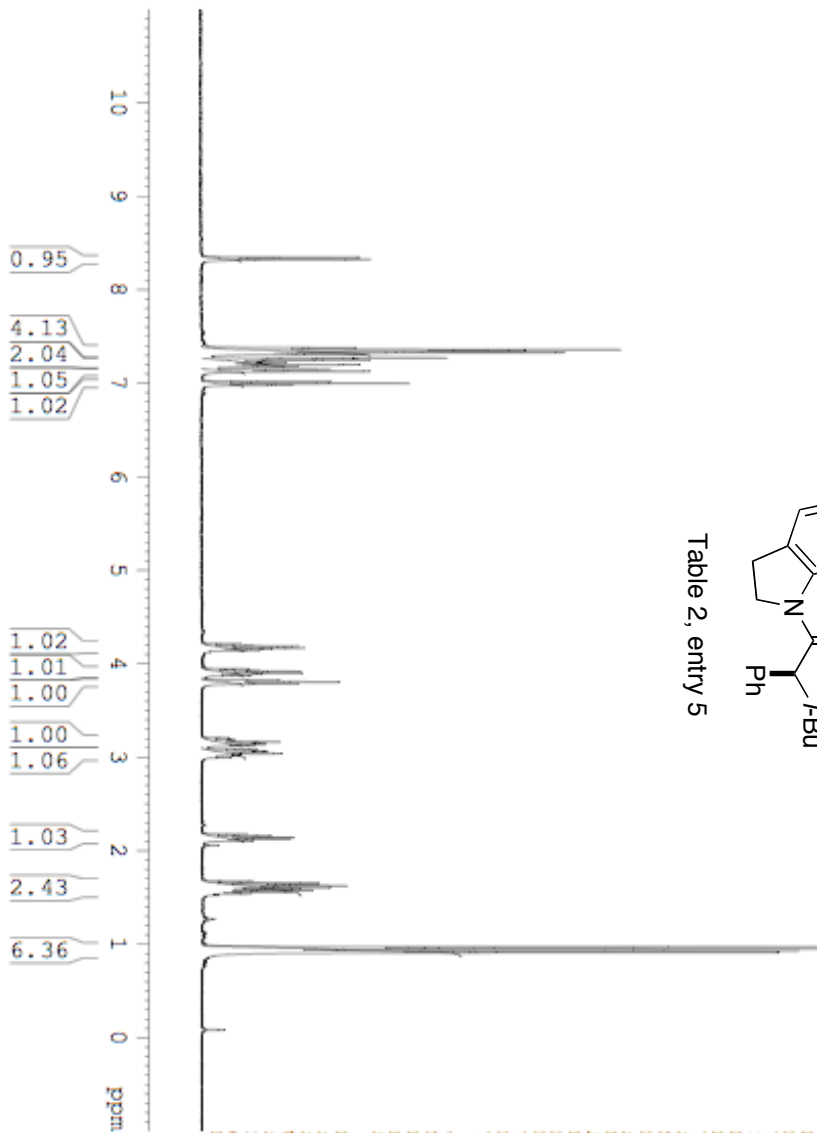

Current Data Parameters  
 NAME V-061  
 EXPNO 1  
 PROCNO 1

F2 - Acquisition Parameters

Date\_ 20090811  
 Time 11:07  
 INSTRUM spect  
 PROBRD 5 mm QNP 1H/13  
 PULPROG zgpg30  
 ID 65536  
 SOLVENT CDCl3  
 NS 16  
 DS 2  
 SFO 8270.146 Hz  
 FIDRES 0.126314 Hz  
 AQ 3.9584243 sec  
 RG 256  
 DW 60.400 usec  
 DE 6.00 usec  
 TE 292.2 K  
 D1 1.00000000 sec  
 TD0 1

===== CHANNEL f1 =====  
 NUC1 1H  
 P1 14.00 usec  
 PL1 0.00 dB  
 SFO1 400.1324710 MHz

F2 - Processing parameters  
 SI 65536  
 SF 400.1300074 MHz  
 WDW EM  
 SSB 0  
 LB 0.30 Hz  
 GB 0  
 PC 1.00

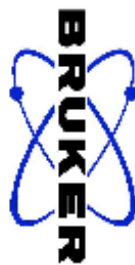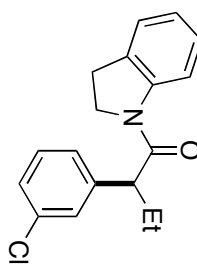

Table 2, entry 6

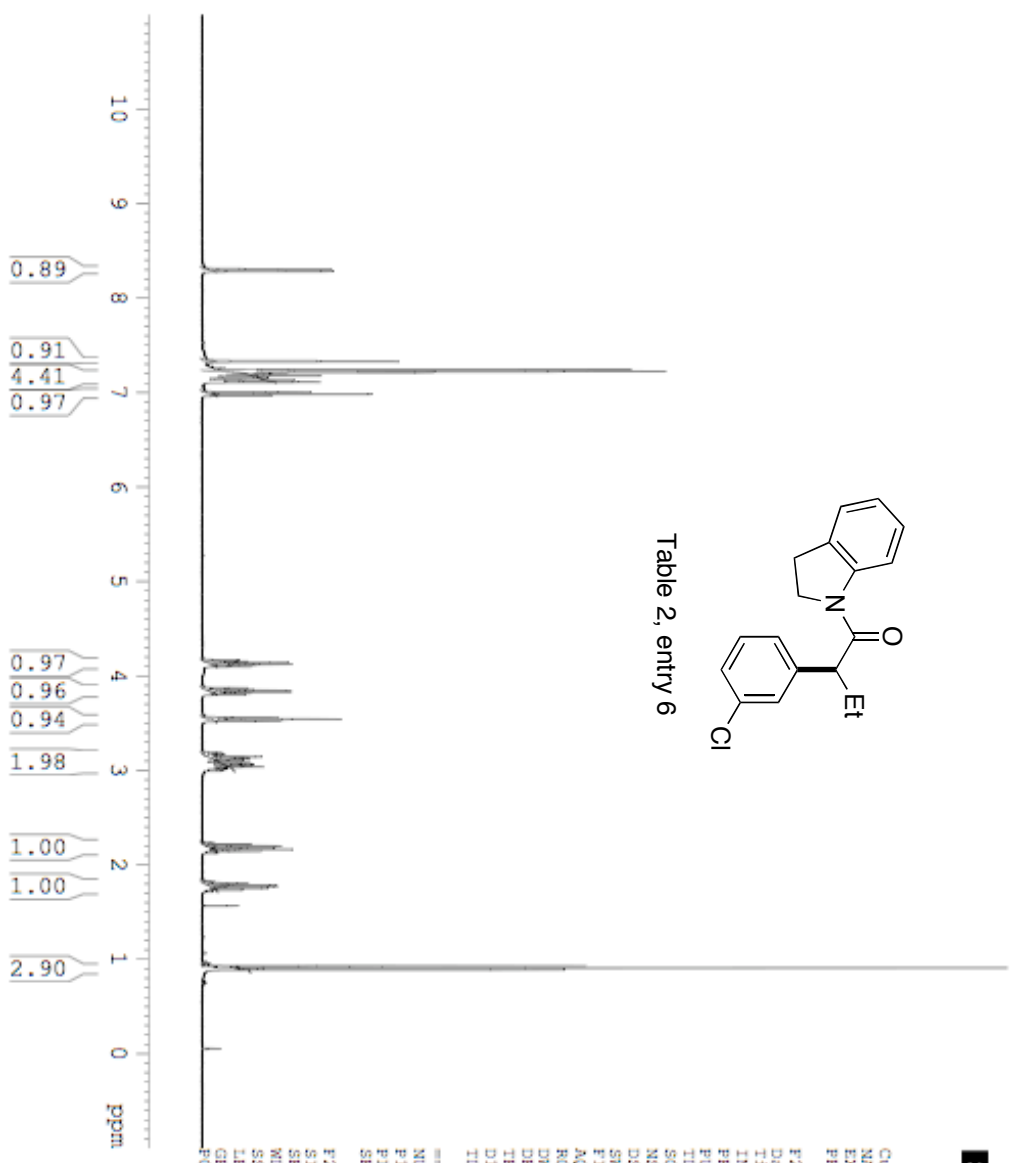

Current Data Parameters  
NAME V-107  
EXNO 7  
PROCNO 1

F2 - Acquisition Parameters  
Date\_ 20100111  
Time 18.26

INSTRUM spect  
PROBHD 5 mm BBO BB-1H  
PULPROG zgpg30  
TD 65536  
SOLVENT CDCl3  
NS 16

DS 2  
SMH 8278.146 Hz  
FIDRES 0.116314 Hz  
AQ 3.9584243 sec  
RG 181  
DM 60.400 usec  
DE 6.00 usec  
TE 293.2 K  
D1 1.00000000 sec  
TD0 1

CHANNEL f1  
NUC1 1H  
P1 15.07 usec  
PL1 0.00 dB  
SFO1 400.1324710 MHz

F2 - Processing parameters  
SI 65536  
SF 400.1300177 MHz  
MDW EM  
SSB 0  
LB 0.30 Hz  
GB 0  
PC 1.00

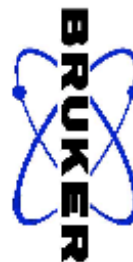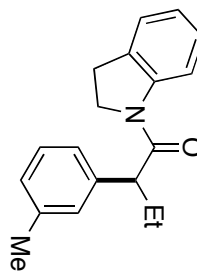

Table 2, entry 7

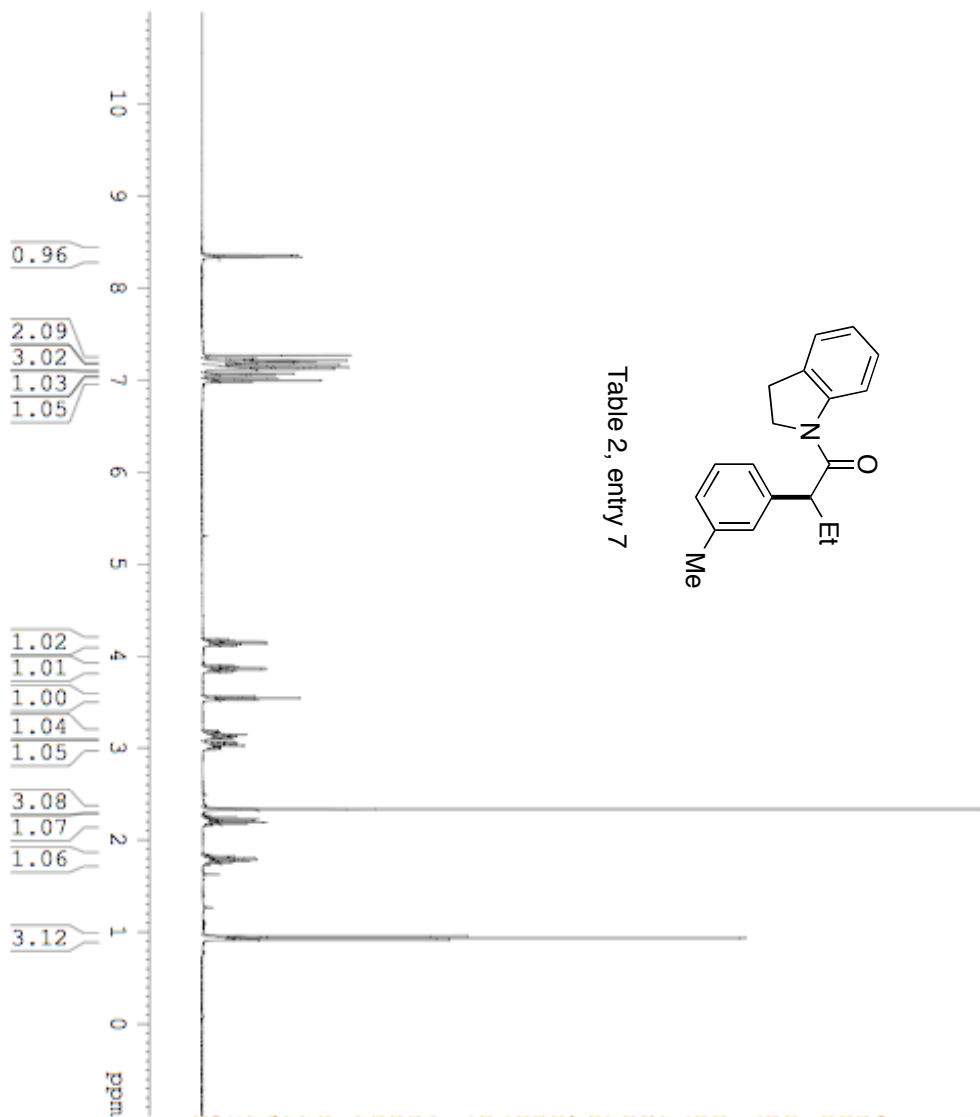

Current Data Parameters  
 NAME V-067  
 EXPNO 5  
 PROCNO 1

F2 - Acquisition Parameters

Date\_ 20100107  
 Time 20.03  
 INSTRUM spect  
 PROBHD 5 mm QNP 1H/13  
 PULPROG zg30  
 TD 65536  
 SOLVENT CDCl3  
 NS 16  
 DS 2  
 SMH 8270.146 Hz  
 FIDRES 0.126314 Hz  
 AQ 3.9584243 sec  
 RG 228.1  
 DM 60.400 usec  
 DE 6.00 usec  
 TE 292.2 K  
 D1 1.00000000 sec  
 TDO 1

===== CHANNEL f1 =====  
 NUC1 1H  
 P1 14.00 usec  
 P11 0.00 dB  
 SFO1 400.1324710 MHz

F2 - Processing parameters  
 SI 65536  
 SF 400.130074 MHz  
 WDW EM  
 SSB 0  
 LB 0.30 Hz  
 GB 0  
 PC 1.00



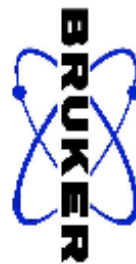

Current Data Parameters  
NAME V-063  
EXPNO 5  
PROCNO 1

F2 - Acquisition Parameters

Date\_ 20100111  
Time 13.50  
INSTRUM spect  
PROBHD 5 mm BBO BB-1H  
PULPROG zg30  
TD 65536  
SOLVENT CDCl3  
NS 16  
DS 2  
SMA 8270.146 Hz  
FIDRES 0.126314 Hz  
AQ 3.9584243 sec  
RG 228.1  
DM 60.400 usec  
DE 6.00 usec  
TE 293.2 K  
D1 1.00000000 sec  
TD0 1

===== CHANNEL f1 =====

NUC1 1H  
P1 15.07 usec  
PL1 0.00 dB  
SFO1 400.1324710 MHz

F2 - Processing parameters

SI 65536  
SE 400.1300212 MHz  
WDW EM  
SSB 0  
LB 0.30 Hz  
GB 0  
PC 1.00

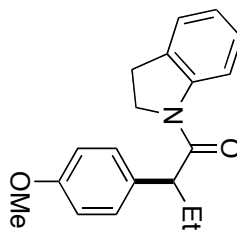

Table 2, entry 8

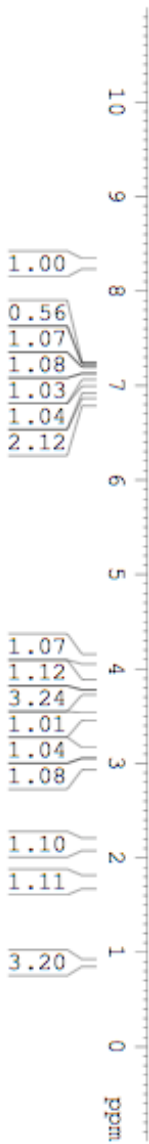

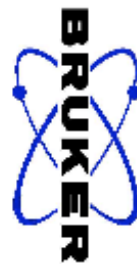

Current Data Parameters  
 NAME V-057  
 EXPNO 6  
 PROCNO 1

F2 - Acquisition Parameters

Date\_ 2010107  
 Time 20.19  
 INSTRUM spect  
 PROBRD 5 mm QNP 1H/13  
 PULPROG zg30  
 ID 65536  
 SOLVENT CDCl3  
 NS 16  
 DS 2  
 SM 8279.146 Hz  
 FIDRES 0.126314 Hz  
 AQ 3.9584243 sec  
 RG 406.4  
 DM 60.400 usec  
 DE 6.00 usec  
 TE 292.2 K  
 D1 1.00000000 sec  
 TD0 1

===== CHANNEL f1 =====

NUC1 1H  
 P1 14.00 usec  
 P1L 0.00 dB  
 SFO1 400.1324710 MHz

F2 - Processing parameters

SI 65536  
 SF 400.1300074 MHz  
 WDW EM  
 SSB 0  
 LB 0.30 Hz  
 GB 0  
 PC 1.00

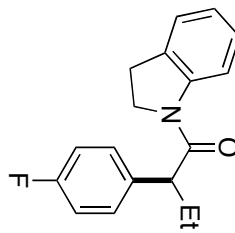

Table 2, entry 9

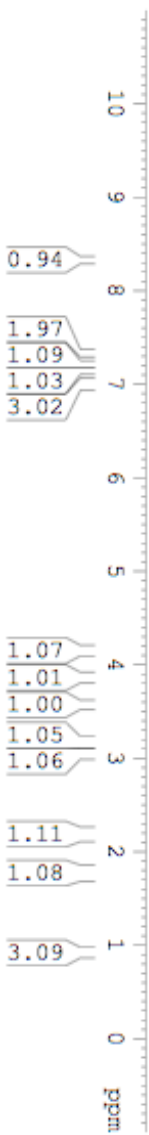

Supplement: NIHMS225483-supplement-1_si_001.pdf [file NIHMS225483-supplement-1_si_001.pdf]
